# Supplementary material for: High-resolution visualisation of antisense oligonucleotide release from polymers in cells
Source: Royal Society of Chemistry journal article supplement (doi:10.1039/d3sc06773d), 2024-01-01
Supplement: d3sc06773d1.pdf [file d3sc06773d1.pdf]

## Supporting Information

# High-Resolution Visualisation of Antisense Oligonucleotide Release from Polymers in Cells

Jessica J. King<sup>‡a,b</sup>, Kai Chen<sup>‡a,b</sup>, Cameron W. Evans<sup>a,b</sup>, Marck Norret<sup>a,b</sup>, Ruba Almasri<sup>a,b,c</sup>, Nathan J. Pavlos<sup>d</sup>, Henry Y.L. Hui<sup>e</sup>, Qiongxian Lin<sup>a,b</sup>, Udit Bhatt<sup>a,b</sup>, Stephen G. Young<sup>f</sup>, Nicole M. Smith<sup>a,b</sup>, Mehran Nikan<sup>g</sup>, Clive A. Prestidge<sup>c</sup>, Haibo Jiang<sup>\*a,b,h</sup>, K. Swaminathan Iyer<sup>\*a,b</sup>

<sup>a</sup> School of Molecular Sciences, The University of Western Australia, Perth WA 6009, Australia.

<sup>b</sup> ARC Training Centre for Next-Generation in Biomedical Analysis, The University of Western Australia, Perth WA 6009, Australia

<sup>c</sup> UniSA Clinical & Health Sciences, University of South Australia, Adelaide SA, Australia

<sup>d</sup> School of Biomedical Sciences, The University of Western Australia, Perth WA 6009, Australia.

<sup>e</sup> Translational Cancer Pathology Laboratory, School of Biomedical Sciences, The University of Western Australia, Perth WA 6009, Australia

<sup>f</sup> Department of Medicine, University of California, Los Angeles, CA 90095, USA.

<sup>g</sup> Ionis Pharmaceuticals, Inc., Carlsbad, CA 92010, USA.

<sup>h</sup> Department of Chemistry, Faculty of Science, University of Hong Kong, Pok Fu Lam, Hong Kong.

## Contents

|                                                                                                                                                                                                                                                                                                                                                                                                                                                                                                                                                                                                                                                                                                                                                                                                    |    |
|----------------------------------------------------------------------------------------------------------------------------------------------------------------------------------------------------------------------------------------------------------------------------------------------------------------------------------------------------------------------------------------------------------------------------------------------------------------------------------------------------------------------------------------------------------------------------------------------------------------------------------------------------------------------------------------------------------------------------------------------------------------------------------------------------|----|
| <b>Supplementary Figure S1.</b> Diffuse distribution of ASO after 24 h results in efficient knockdown activity. Representative confocal images of Cy3-ASO (100 nM) delivery into cells after 24 h incubation. ASO (Cy3, red), EEA1 (Alexa Fluor 488, green) and nuclei (Hoechst 34580, blue). Scale bar 10 $\mu\text{m}$ .                                                                                                                                                                                                                                                                                                                                                                                                                                                                         | S3 |
| <b>Supplementary Figure S2.</b> Representative confocal images of Cy3-labelled <i>MALATI</i> ASO (100 nM) delivery into cells after 30 min, 3 h, 6 h, and 24 h incubation. ASO-Cy3 (red), Rab7 (green) and nuclei (blue). Scale bar 20 $\mu\text{m}$ .                                                                                                                                                                                                                                                                                                                                                                                                                                                                                                                                             | S4 |
| <b>Supplementary Figure S3.</b> RNAiMAX delivers ASO into nucleus of HeLa cells. <b>(a)</b> Scanning electron microscopy (SEM) and NanoSIMS images showing the delivery of ASO into the nucleus of HeLa cells by RNAiMAX. SEM image, bromine labelled ASO ( $^{79}\text{Br}$ NanoSIMS image), composite $^{79}\text{Br}$ (red), $^{12}\text{C}^{14}\text{N}$ (grey). <b>(b)</b> Quantification of ASO ( $^{79}\text{Br}$ signal) in subcellular compartments.                                                                                                                                                                                                                                                                                                                                      | S5 |
| <b>Supplementary Figure S4.</b> Bromine labelled polymer facilitated polymer tracking via NanoSIMS. <b>(a)</b> Bromine labelling of generation 5 (G5) dendronised polymer. <b>(b)</b> Size of polyplex complexes at various N/P ratios. Data shown as mean $\pm$ S.E.M. <b>(c)</b> Surface charge (zeta potential) of polyplexes at different N/P ratios. Data shown as mean $\pm$ S.E.M. <b>(d)</b> Quantification of bromine ( <i>i.e.</i> , polymer) signal, collected from 10 cells. <b>(e)</b> Representative images of the localisation of bromine labelled polymer (unbound to ASO) in cells. SEM image, bromine labelled polymer ( $^{79}\text{Br}$ NanoSIMS image), composite $^{79}\text{Br}$ (red), $^{32}\text{S}$ (grey), composite $^{79}\text{Br}$ (green), $^{32}\text{S}$ (blue). | S6 |
| <b>Supplementary Figure S5.</b> $^1\text{H}$ NMR spectra (500 MHz, MeOD, 25 $^\circ\text{C}$ ) of G5 PAMAM dendronised polymer (top), and bromobenzyl modified polymer used for NanoSIMS (bottom). The appearance of signals at $\delta\text{H}$ 7.73–7.61 ppm (blue shaded region) confirms polymer labelling with Br.                                                                                                                                                                                                                                                                                                                                                                                                                                                                            | S7 |

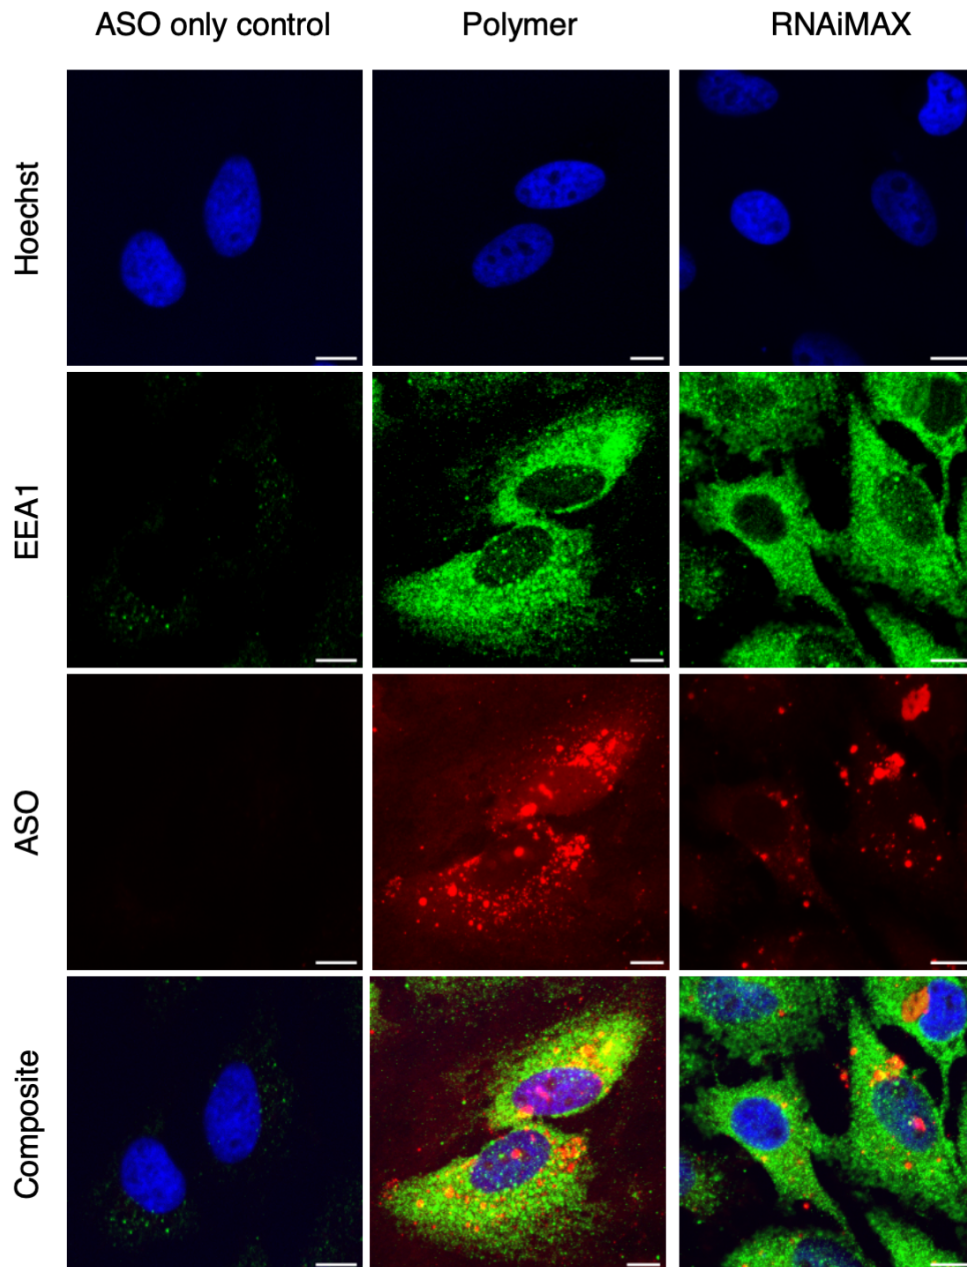

**Supplementary Figure S1.** Diffuse distribution of ASO after 24 h results in efficient knockdown activity. Representative confocal images of Cy3-ASO (100 nM) delivery into cells after 24 h incubation. ASO (Cy3, red), EEA1 (Alexa Fluor 488, green) and nuclei (Hoechst 34580, blue). Scale bar 10  $\mu$ m.

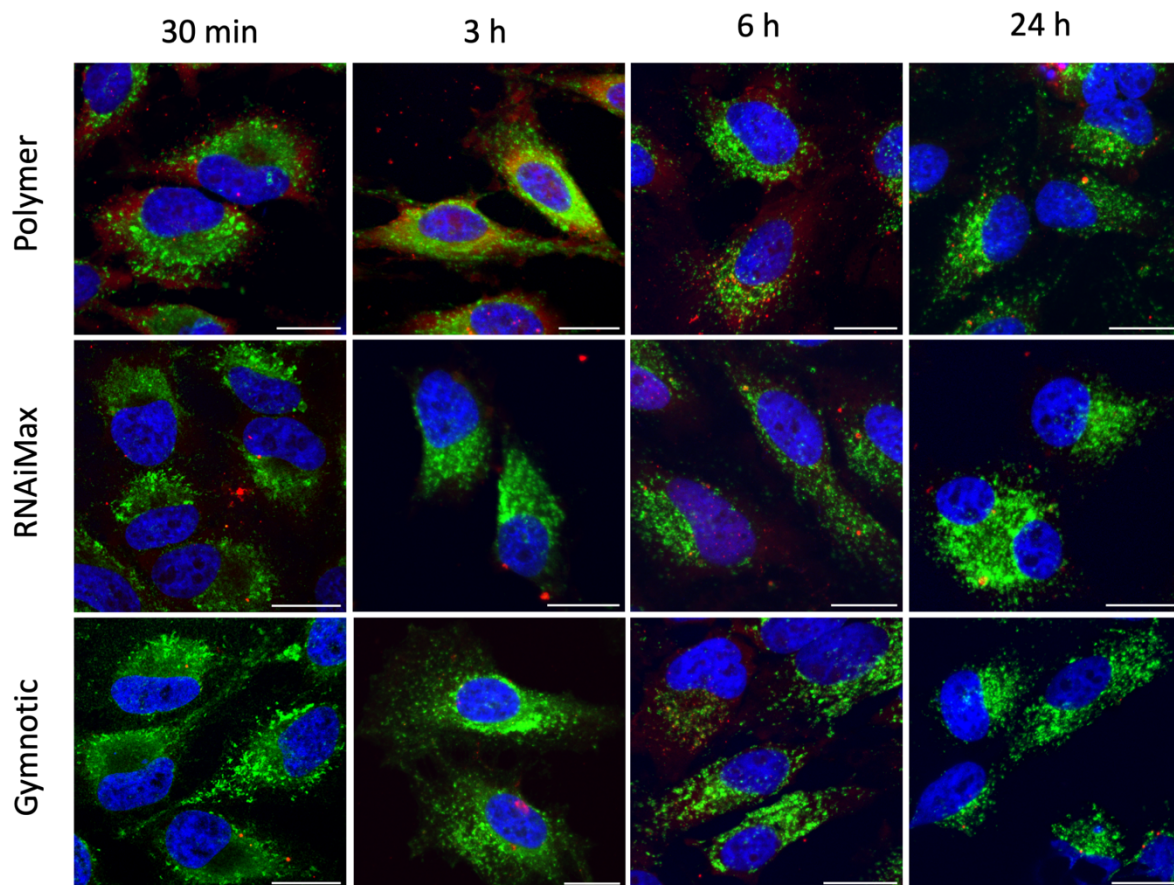

**Supplementary Figure S2.** Representative confocal images of Cy3-labelled *MALAT1* ASO (100 nM) delivery into cells after 30 min, 3 h, 6 h, and 24 h incubation. ASO-Cy3 (red), Rab7 (green) and nuclei (blue). Scale bar 20  $\mu$ m.

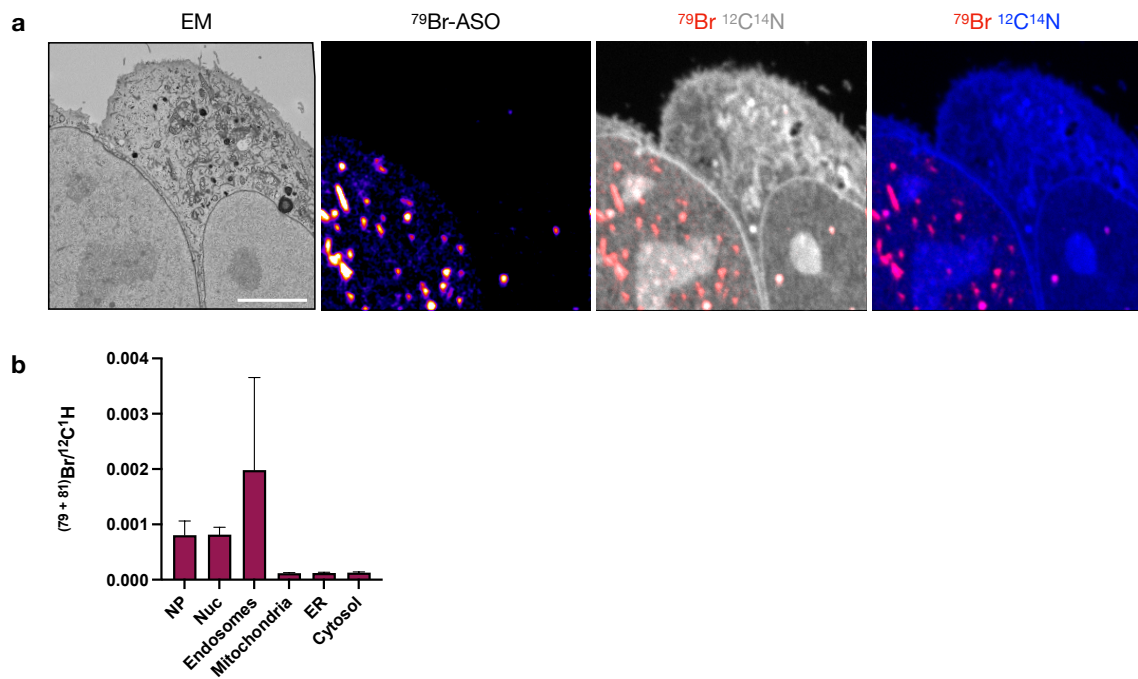

**Supplementary Figure S3.** RNAiMAX delivers ASO into nucleus of HeLa cells. **(a)** Scanning electron microscopy (SEM) and NanoSIMS images showing the delivery of ASO into the nucleus of HeLa cells by RNAiMAX. SEM image, bromine labelled ASO ( $^{79}\text{Br}$  NanoSIMS image), composite  $^{79}\text{Br}$  (red),  $^{12}\text{C}^{14}\text{N}$  (grey). **(b)** Quantification of ASO ( $^{79}\text{Br}$  signal) in subcellular compartments.

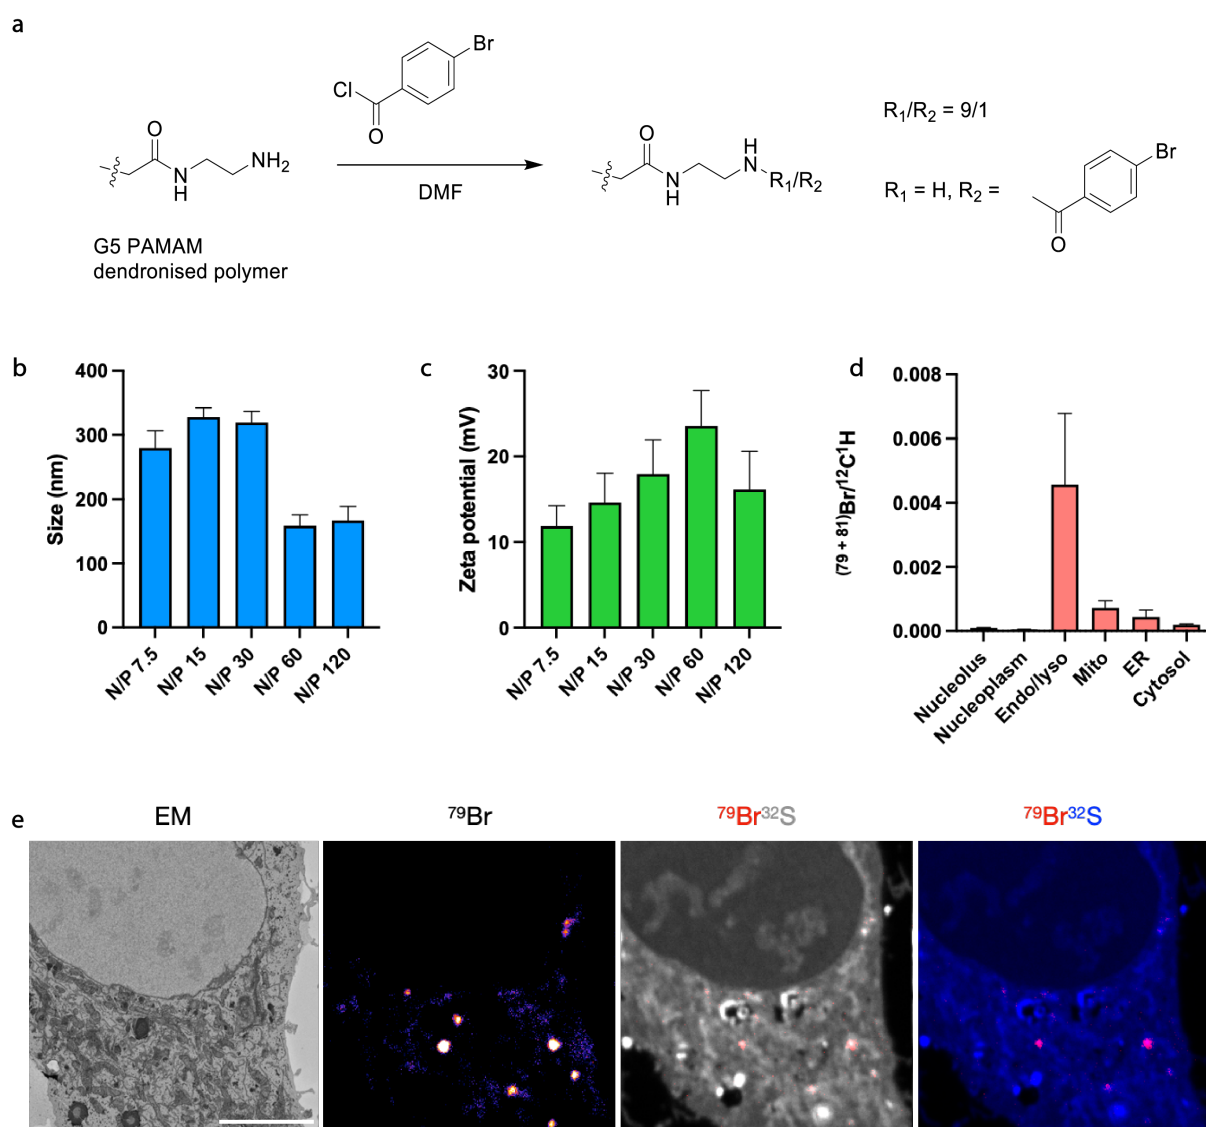

**Supplementary Figure S4.** Bromine labelled polymer facilitated polymer tracking via NanoSIMS. **(a)** Bromine labelling of generation 5 (G5) dendronised polymer. **(b)** Size of polyplex complexes at various N/P ratios. Data shown as mean  $\pm$  S.E.M. **(c)** Surface charge (zeta potential) of polyplexes at different N/P ratios. Data shown as mean  $\pm$  S.E.M. **(d)** Quantification of bromine (*i.e.*, polymer) signal, collected from 10 cells. **(e)** Representative images of the localisation of bromine labelled polymer (unbound to ASO) in cells. SEM image, bromine labelled polymer ( $^{79}\text{Br}$  NanoSIMS image), composite  $^{79}\text{Br}$  (red),  $^{32}\text{S}$  (grey), composite  $^{79}\text{Br}$  (green),  $^{32}\text{S}$  (blue).

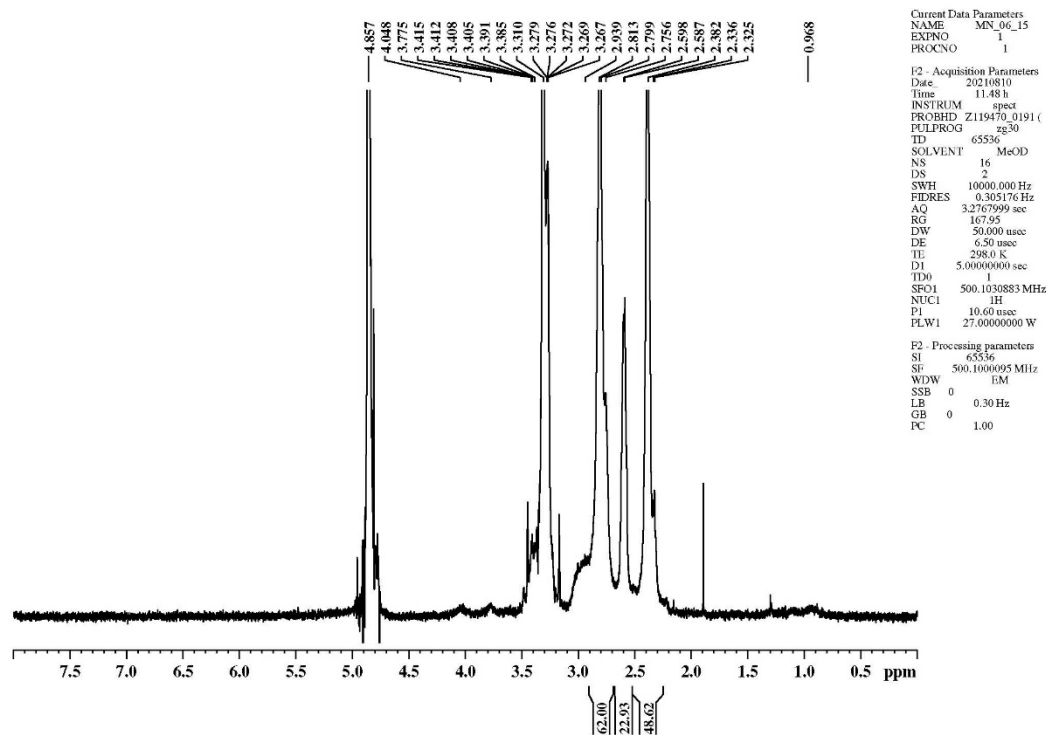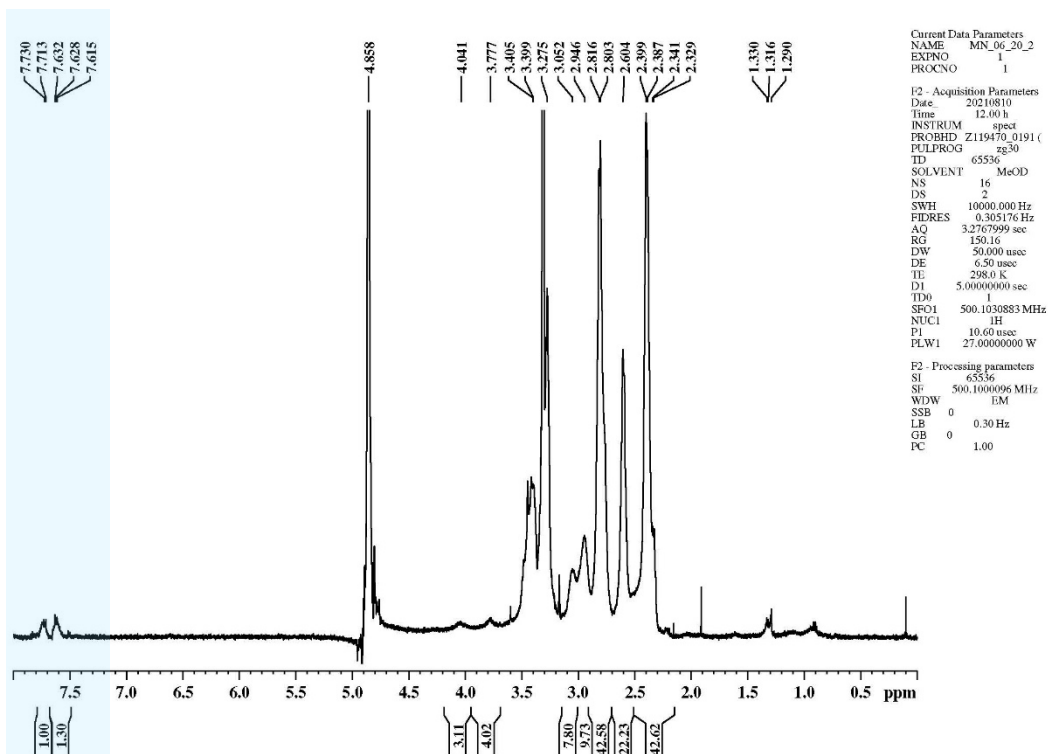

**Supplementary Figure S5.**  $^1\text{H}$  NMR spectra (500 MHz, MeOD, 25 °C) of G5 PAMAM dendronised polymer (top), and bromobenzyl modified polymer used for NanoSIMS (bottom). The appearance of signals at  $\delta_{\text{H}}$  7.73–7.61 ppm (blue shaded region) confirms polymer labelling with Br.
